# Supplementary material
Source: PubMed Central journal article supplement (PMC4067252)
Supplement: NIHMS584004-supplement-supplement_1.pdf [file NIHMS584004-supplement-supplement_1.pdf]

**SUPPLEMENTARY MATERIAL**

**Supplementary Figure 1: Mean eGFR over time in patients stratified by pre-MCS eGFR**

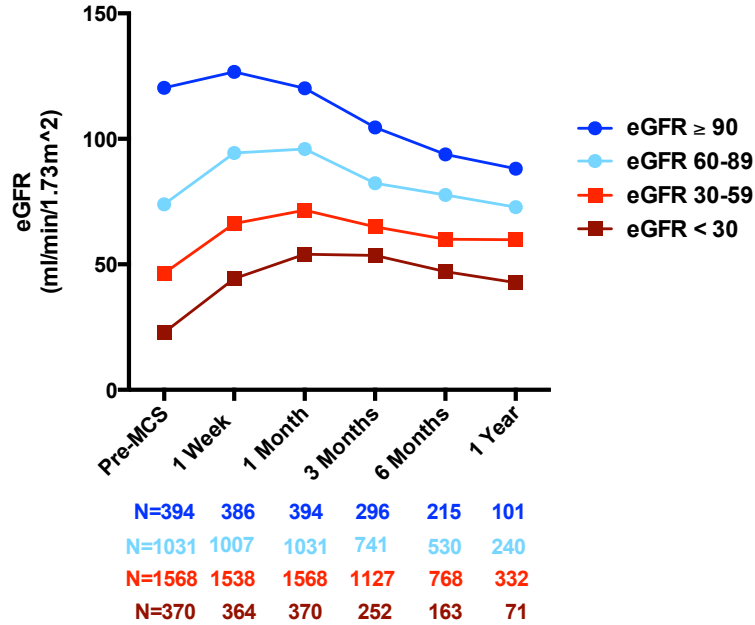

Sample sizes (N) refer to the number of patients with data available at each time point encompassed by the respective line. eGFR: estimated glomerular filtration rate, MCS: mechanical circulatory support, IRF: improvement in renal function.
